# Supplementary material for: Three-dimensional self-branching anatase TiO2 nanorods: morphology control, growth mechanism and dye-sensitized solar cell application
Source: Royal Society of Chemistry journal article supplement (doi:10.1039/c4ta02761b), 2014-01-01
Supplement: c4ta02761b1.pdf [file c4ta02761b1.pdf]

## Supporting Information

### **Three-Dimensional Self-Branching Anatase TiO<sub>2</sub> Nanorods: Morphology Control, Growth Mechanism and Dye-Sensitized Solar Cells Application**

Weiguang Yang,<sup>a</sup> Yueyang Xu,<sup>a</sup> Ying Tang,<sup>a</sup> Chen Wang,<sup>a</sup> Yajing Hu,<sup>a</sup> Lu Huang,<sup>a</sup> Jin  
Liu,<sup>a</sup> Jun Luo,<sup>a</sup> Haibo Guo,<sup>a</sup> Yigang Chen,<sup>a</sup> Weimin Shi<sup>a</sup> and Yali Wang<sup>\*a,b</sup>

<sup>a</sup> Department of Electronic Information Materials, School of Materials Science and  
Engineering, Shanghai University, Shanghai 200444, China.

<sup>b</sup> Nano-Science and Nano-Technology Research Center, School of Materials Science  
and Engineering, Shanghai University, Shanghai 200444, China.

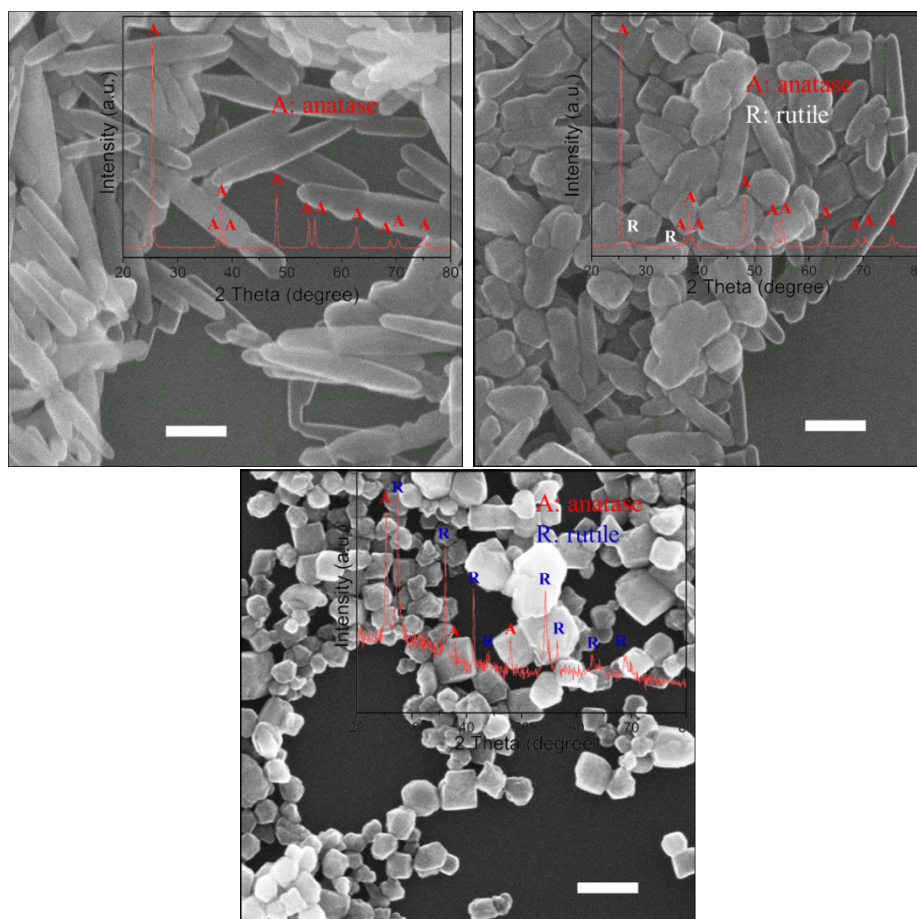

**Fig. S1** SEM images of the as-obtained products prepared for 24 h with different weight ratios of F127/TBAH: (a) 1.0, (b) 1.1, and (c) 1.4. Inset: their XRD patterns. Scale bars: 200 nm. The percentages of rutile and anatase were calculated using the method outlined by Spurr and Myers (R. A. Spurr, H. Myers, *Anal. Chem.* 1957, **29**, 760).

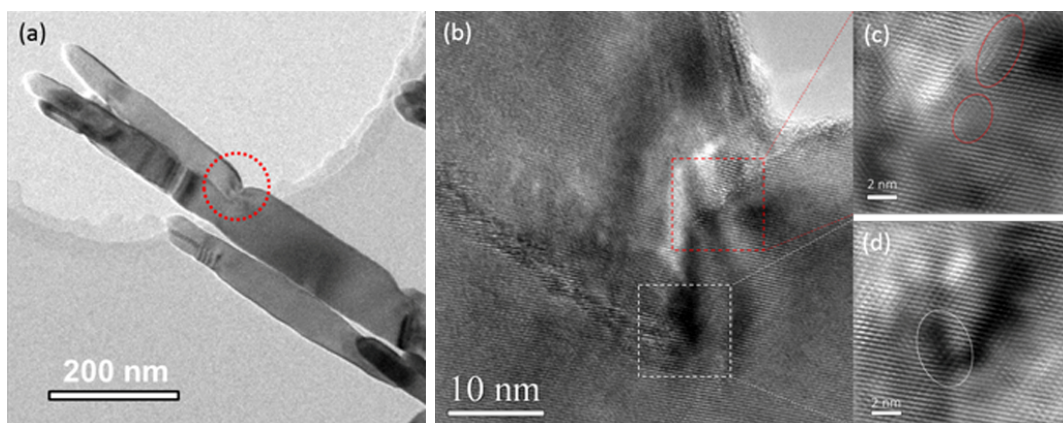

**Fig. S2** (a) TEM image of the as-obtained products prepared for 8 h with 0.9 of the weight ratios of F127/TBAH. (b) HRTEM image of branch-main rod interface marked by the red dashed circle in a). (c and d) magnified images from the red and white rectangle-enclosed areas in (b), respectively. The red ellipses in (c) and white ellipse in (d) represent the defects.

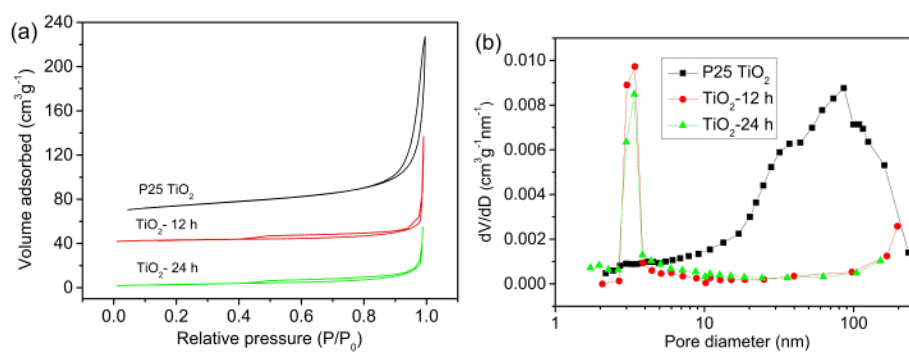

**Fig. S3** Nitrogen adsorption-desorption isotherm curves (a) and Barret-Joyner-Halenda (BJH) pore size distribution plot (b) of self-branching  $\text{TiO}_2$  obtained with the reaction time of 12 and 24 h and P25  $\text{TiO}_2$ .
